# Supplementary material
Source: PubMed Central journal article supplement (PMC2913067)
Supplement: NIHMS223314-supplement-Supp1.pdf [file NIHMS223314-supplement-Supp1.pdf]

## Supplementary Figure 1

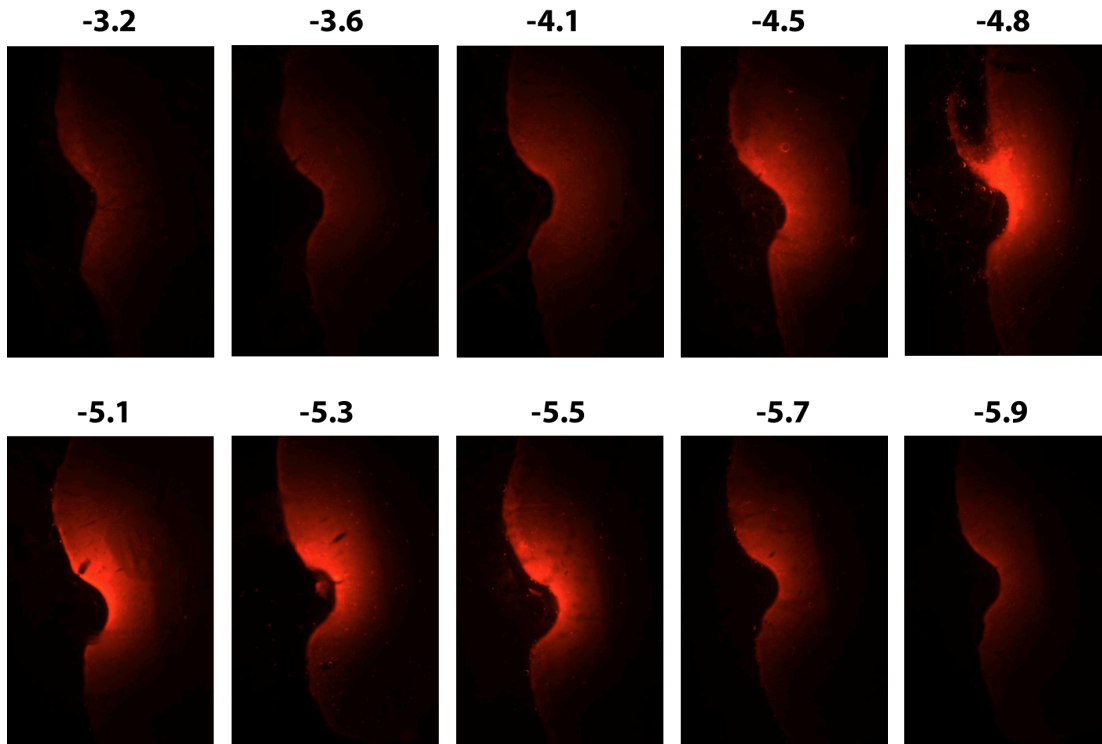

**Supplementary Figure 1.** Representative photomicrographs showing the antero-posterior spread of fluorescent muscimol along the perirhinal cortex. The cannula tip is visible at the bregma-4.8mm plane. The numbers above the photomicrographs denote the distances from bregma.
